# Supplementary material for: A Retrospective Comparison of DLI and gDLI for Post-Transplant Treatment
Source: PubMed Central journal article supplement (PMC7408819; doi:10.3390/jcm9072204), 2020-07-12
Supplement: jcm-09-02204-s001.pdf [file jcm-09-02204-s001.pdf]

**Table S1.** Univariate and multivariate logistic regression analysis for TRM after DLI treatment, *n* = 139.

|                                     | Univariate HR (95% CI)        | <i>p</i> | Multivariate HR (95% CI)* | <i>p</i> |
|-------------------------------------|-------------------------------|----------|---------------------------|----------|
| Age at DLI >60 years, n=32          | 1.19 (0.37-3.81)              | 0.800    |                           |          |
| Gender                              |                               |          |                           |          |
| Female                              | 1 (ref)                       | -        |                           |          |
| Male (n=76)                         | 1.14 (0.40-3.29)              | 0.800    |                           |          |
| Disease                             |                               |          |                           | ns       |
| Hodgkin Lymphoma                    | 1.85 (0.34-10.13)             | 0.478    |                           |          |
| Acute lymphoblastic leukaemia       | 0.75 (0.14-4.11)              | 0.740    |                           |          |
| Acute myeloblastic leukaemia        | 1 (ref)                       | -        |                           |          |
| Chronic lymphocytic leukaemia       | 0.67 (0.07-6.08)              | 0.724    |                           |          |
| Chronic myeloid leukaemia           | 0.87x10 <sup>-8</sup> (0-inf) | 1.000    |                           |          |
| Non-Hodgkin lymphoma                | 0.46 (0.05-4.18)              | 0.492    |                           |          |
| Multiple myeloma                    | 0.58 (0.14-2.35)              | 0.447    |                           |          |
| Osteomyelofibrosis                  | 0.89x10 <sup>-8</sup> (0-inf) | 1.000    |                           |          |
| Myelodysplasia                      | 0.87x10 <sup>-8</sup> (0-inf) | 0.998    |                           |          |
| Indication for DLI                  |                               |          |                           |          |
| Pre-emptive                         | 1 (ref)                       | -        |                           |          |
| Relapse (n=96)                      | 1.86 (0.58-5.96)              | 0.300    |                           | ns       |
| Associated treatment (n=133)        |                               |          |                           |          |
| No                                  | 1 (ref)                       |          |                           |          |
| Yes (n=46)                          | 0.54 (0.15-1.92)              | 0.300    |                           |          |
| Type of DLI                         |                               |          |                           |          |
| Classical                           | 1 (ref)                       | -        |                           |          |
| gDLI (n=71)                         | 1.72 (0.58-5.13)              | 0.300    |                           | ns       |
| Post DLI GvHD (n=137)               |                               |          | 5.18 (1.16-23.20)         | 0.011    |
| No GvHD                             | 1 (ref)                       |          |                           |          |
| GvHD not requiring treatment (n=32) | 1.55 (0.22-11.07)             | 0.660    |                           |          |
| Treatment-requiring GvHD (n=32)     | 9.60 (2.10-43.86)             | 0.004    |                           |          |

Abbreviations: TRM= Toxicity Related Mortality, DLI= Donor Lymphocyte Infusion, gDLI= g-csf stimulated Donor Lymphocyte Infusion, HR= Hazard Ratio, CI= Confidence Interval, GvHD= graft versus host disease. \* Multivariate model for indication comparing Non-Hodgkin Lymphoma and myelodysplasia vs. others, model for indication comparing relapse and pre-emptive situation vs. others and model for GvHD comparing treatment-requiring GvHD vs. others.

**Table S2.** Univariate and multivariate logistic regression analysis for OS after DLI treatment, n=139.

|                               | Univariate HR (95% CI) | P     | Multivariate HR (95% CI)* | P     |
|-------------------------------|------------------------|-------|---------------------------|-------|
| Age at DLI >60 years, n=32    | 0.85 (0.50-1.43)       | 0.50  |                           |       |
| Gender                        |                        |       |                           |       |
| Female                        | 1 (ref)                | -     |                           |       |
| Male (n=76)                   | 1.15 (0.75-1.78)       | 0.50  |                           |       |
| Disease                       |                        |       | 0.29 (0.11-0.81)          | 0.02  |
| Hodgkin Lymphoma              | 0.58 (0.23-1.49)       | 0.26  |                           |       |
| Acute lymphoblastic leukaemia | 0.49 (0.25-0.96)       | 0.04  |                           |       |
| Acute myeloblastic leukaemia  | 1 (ref)                | -     |                           |       |
| Chronic lymphocytic leukaemia | 0.31 (0.11-0.89)       | 0.03  |                           |       |
| Chronic myeloid leukaemia     | 0.59 (0.08-4.34)       | 0.61  |                           |       |
| Non-Hodgkin lymphoma          | 0.23 (0.08-0.66)       | 0.01  |                           |       |
| Multiple myeloma              | 0.38 (0.22-0.66)       | <0.01 |                           |       |
| Osteomyelofibrosis            | 3.63 (0.48-27.40)      | 0.21  |                           |       |
| Myelodysplasia                | 0.46 (0.16-1.29)       | 0.14  |                           |       |
| Indication for DLI            |                        |       |                           |       |
| Pre-emptive                   | 1 (ref)                | -     |                           |       |
| Relapse (n=96)                | 5.06 (2.68-9.58)       | <0.01 | 5.59 (2.95-10.59)         | <0.01 |
| Associated treatment (n=133)  |                        |       |                           |       |
| No                            | 1 (ref)                |       |                           |       |
| Yes (n=46)                    | 0.92 (0.57-1.47)       | 0.70  |                           |       |
| Type of DLI                   |                        |       |                           |       |
| Classical                     | 1 (ref)                | -     |                           |       |
| gDLI (n=71)                   | 0.96 (0.62-1.47)       | 0.80  |                           | ns    |
| Post DLI GvHD (n=137)         |                        |       |                           | ns    |
| No GvHD                       | 1 (ref)                |       |                           |       |

|                                     |                  |      |
|-------------------------------------|------------------|------|
| GvHD not requiring treatment (n=32) | 0.50 (0.29-0.87) | 0.01 |
| Treatment-requiring GvHD (n=32)     | 0.61 (0.35-1.08) | 0.09 |

Abbreviations: OS= Overall Survival, DLI= Donor Lymphocyte Infusion, gDLI= g-csf stimulated Donor Lymphocyte Infusion, HR= Hazard Ratio, CI= Confidence Interval, GvHD= graft versus host disease. \* Multivariate model for indication comparing Non-Hodgkin Lymphoma and myelodysplasia vs. others, model for indication comparing relapse and pre-emptive situation vs. others and model for GvHD comparing treatment requiring GvHD vs. others.

**Table S3.** Univariate and multivariate logistic regression analysis for PFS after DLI treatment, n=139.

|                               | Univariate HR<br>(95% CI) | P     | Multivariate HR<br>(95% CI)* | P     |
|-------------------------------|---------------------------|-------|------------------------------|-------|
| Age at DLI >60 years, n=32    | 1.05 (0.61-1.78)          | 0.90  |                              |       |
| Gender                        |                           |       |                              |       |
| Female                        | 1 (ref)                   | -     |                              |       |
| Male (n=76)                   | 1.05 (0.66-1.64)          | 0.80  |                              |       |
| Disease                       |                           |       |                              |       |
|                               |                           |       | 0.21 (0.06-0.66)             | <0.01 |
| Hodgkin Lymphoma              | 0.55 (0.24-1.08)          | 0.26  |                              |       |
| Acute lymphoblastic leukaemia | 0.51 (0.24-1.08)          | 0.08  |                              |       |
| Acute myeloblastic leukaemia  | 1 (ref)                   | -     |                              |       |
| Chronic lymphocytic leukaemia | 0.47 (0.16-1.34)          | 0.16  |                              |       |
| Chronic myeloid leukaemia     | 0.64 (0.09-4.73)          | 0.66  |                              |       |
| Non-Hodgkin lymphoma          | 0.23 (0.07-0.76)          | 0.02  |                              |       |
| Multiple myeloma              | 0.68 (0.39-1.20)          | 0.18  |                              |       |
| Osteomyelofibrosis            | 5.36 (0.70-41.15)         | 0.11  |                              |       |
| Myelodysplasia                | 0.45 (0.16-1.29)          | 0.14  |                              |       |
| Indication for DLI            |                           |       |                              |       |
| Pre-emptive                   | 1 (ref)                   | -     |                              |       |
| Relapse (n=96)                | 3.31 (1.87-5.86)          | <0.01 | 3.53 (1.98-6.28)             | <0.01 |
| Associated treatment (n=133)  |                           |       |                              |       |
| No                            | 1 (ref)                   |       |                              |       |
| Yes (n=46)                    | 1.49 (0.94-2.35)          | 0.09  |                              |       |
| Type of DLI                   |                           |       |                              |       |
| Classical                     | 1 (ref)                   | -     |                              |       |
| gDLI (n=71)                   | 1.03 (0.66-1.62)          | 0.90  |                              | ns    |
| Post DLI GvHD (n=137)         |                           |       | 0.40 (0.25-0.65)             | <0.01 |

|                                     |                  |       |
|-------------------------------------|------------------|-------|
| No GvHD                             | 1 (ref)          |       |
| GvHD not requiring treatment (n=32) | 0.56 (0.33-0.94) | 0.03  |
| Treatment-requiring GvHD (n=32)     | 0.19 (0.08-0.45) | <0.01 |

Abbreviations: PFS= Progression Free Survival, DLI= Donor Lymphocyte Infusion, gDLI= g-csf stimulated Donor Lymphocyte Infusion, HR= Hazard Ratio, CI= Confidence Interval, GvHD= graft versus host disease. \* Multivariate model for indication comparing Non-Hodgkin Lymphoma and myelodysplasia vs. others, model for indication comparing relapse and pre-emptive situation vs. others and model for GvHD comparing treatment-requiring GvHD vs. others.

**Table S4.** Patient outcomes after DLI for relapse indication, n=96.

|                                 | All DLI<br>n= 96 | Classical DLI<br>n=48 (50.0%) | gDLI<br>n=48 (50.0%) | P    |
|---------------------------------|------------------|-------------------------------|----------------------|------|
| Complete response, n (%), n=88  |                  | n=44                          | n=44                 | 0.33 |
| Yes                             | 23 (26.1)        | 9 (20.5)                      | 14 (31.8)            |      |
| No                              | 65 (73.9)        | 35 (79.5)                     | 30 (68.2)            |      |
| Post-DLI GvHD, n (%), n=94      |                  | n=44                          |                      |      |
| All grades of GvHD              | 38 (40.4)        | 18 (40.9)                     | 20 (41.7)            | 0.84 |
| Treatment-requiring GvHD, n (%) | 18 (19.1)        | 7 (15.9)                      | 11 (22.9)            | 0.58 |
| Progression-free survival       |                  |                               |                      | 0.90 |
| Median PFS (months, IQR)        | 5 (2-22)         | 4 (2-20)                      | 6 (3-22)             |      |
| 5-year PFS (% , IQR)            | 23 (15-36)       | 21 (11-41)                    | 26 (14-47)           |      |
| Overall survival,               |                  |                               |                      | 0.90 |
| Median OS (months, IQR)         | 12 (4-37)        | 13 (2-42)                     | 10 (4-33)            |      |
| 5 years of OS (% , IQR)         | 24 (16-35)       | 25 (15-42)                    | 22 (13-40)           |      |
| Cause of Mortality, n (%), n=73 |                  | n=35                          | n=36                 | 0.05 |
| Progression                     | 58 (79.5)        | 33 (94.3)                     | 25 (69.4)            |      |
| Toxicity                        | 10 (13.7)        | 2 (5.7)                       | 8 (22.2)             |      |
| Other                           | 3 (4.1)          | 0                             | 3 (8.3)              |      |

Abbreviations: gDLI= g-csf primed DLI, DLI= Donor Lymphocyte Infusion, GvHD= graft versus host disease, IQR= interquartile range, OS= overall survival, PFS= progression-free survival.

**Table S5.** Patient outcomes after DLI for pre-emptive indication, n=43.

|                                 | All DLI<br>n= 43 | Classical DLI<br>n = 20 (46.5%) | gDLI<br>n = 23 (53.5%) | P    |
|---------------------------------|------------------|---------------------------------|------------------------|------|
| Complete response, n (%)        |                  |                                 |                        | 0.76 |
| Yes                             | 27 (62.8)        | 12 (60.0)                       | 15 (65.2)              |      |
| No                              | 16 (37.2)        | 8 (40.0)                        | 8 (34.8)               |      |
| Post-DLI GvHD, n (%)            |                  |                                 |                        |      |
| All grades of GvHD              | 26 (60.5)        | 12 (60.0)                       | 14 (60.9)              | 1    |
| Treatment-requiring GvHD, n (%) | 14 (39.5)        | 7 (35.0)                        | 7 (30.4)               | 0.93 |
| Progression-free survival       |                  |                                 |                        | 0.60 |
| Median PFS (months, IQR)        | 30 (13-67)       | 29 (16-67)                      | 30 (9-58)              |      |
| 5-year PFS (% , IQR)            | 67 (54-84)       | 67 (48-93)                      | 67 (50-91)             |      |
| Overall survival,               |                  |                                 |                        | 0.20 |
| Median OS (months, IQR)         | 40 (22-68)       | 60 (24-75)                      | 37 (17-57)             |      |
| 5 years of OS (% , IQR)         | 68 (54-87)       | 67 (48-93)                      | 71 (50-100)            |      |
| Cause of Mortality, n (%), n=11 |                  | n=7                             | n=4                    | 0.45 |
| Progression                     | 7 (63.6)         | 4 (57.1)                        | 3 (75.0)               |      |
| Toxicity                        | 4 (36.4)         | 3 (42.9)                        | 1 (25.0)               |      |
| Other                           | 0                | 0                               | 0                      |      |

Abbreviations: gDLI= g-csf primed DLI, DLI= Donor Lymphocyte Infusion, GvHD= graft versus host disease, IQR= interquartile range, OS= overall survival, PFS= progression-free survival.

**Table S6.** Outcomes of AML patients, n=45.

|                                 | All DLI<br>n= 45 | Classical DLI<br>n=20 (44.4%) | gDLI<br>n=25 (55.6%) | p    |
|---------------------------------|------------------|-------------------------------|----------------------|------|
| Complete response, n (%), n=42  |                  | n=19                          | n=23                 | 0.50 |
| Yes                             | 11 (26.2)        | 6 (31.6)                      | 5 (21.7)             |      |
| No                              | 31 (73.8)        | 13 (68.4)                     | 18 (78.3)            |      |
| Post-DLI GvHD, n (%)            |                  |                               |                      |      |
| All grades of GvHD              | 18 (40.0)        | 9 (45.0)                      | 9 (36.0)             | 0.56 |
| Treatment-requiring GvHD, n (%) | 11 (24.4)        | 4 (21.1)                      | 7 (28.0)             | 0.34 |
| Progression-free survival       |                  |                               |                      | 0.50 |
| Median PFS (months, IQR)        | 4 (1-11)         | 3 (1-21)                      | 4 (3-7)              |      |
| 5-year PFS (% , IQR)            | 31 (18-52)       | 36 (18-74)                    | 26 (12-56)           |      |
| Overall survival,               |                  |                               |                      | 0.30 |
| Median OS (months, IQR)         | 6 (2-22)         | 7 (2-31)                      | 6 (3-11)             |      |
| 5 years of OS (% , IQR)         | 21 (11-40)       | 27 (11-62)                    | 16 (6-43)            |      |
| Cause of Mortality, n (%), n=31 |                  | n=13                          | n=18                 | 0.73 |
| Progression                     | 25 (80.6)        | 11 (84.6)                     | 14 (77.8)            |      |
| Toxicity                        | 4 (12.9)         | 2 (15.4)                      | 2 (11.1)             |      |
| Other                           | 2 (6.5)          | 0                             | 2 (11.1)             |      |

Abbreviations: gDLI= g-csf primed DLI, DLI= Donor Lymphocyte Infusion, GvHD= graft versus host disease, IQR= interquartile range, OS= overall survival, PFS= progression-free survival

**Table S7.** Outcomes of Myeloma patients, n=45.

|                                 | All DLI<br>n= 38 | Classical DLI<br>n=18 (47.4%) | gDLI<br>n=20 (52.6%) | P    |
|---------------------------------|------------------|-------------------------------|----------------------|------|
| Complete response, n (%), n=35  |                  | n=16                          | n=19                 | 0.29 |
| Yes                             | 13 (37.1)        | 4 (25.0)                      | 9 (47.4)             |      |
| No                              | 22 (62.9)        | 12 (75.0)                     | 10 (52.6)            |      |
| Post-DLI GvHD, n (%), n=37      |                  |                               |                      |      |
| All grades of GvHD              | 23 (62.2)        | 8 (44.4)                      | 15 (75.0)            | 0.10 |
| Treatment-requiring GvHD, n (%) | 14 (37.8)        | 4 (22.2)                      | 5 (25.0)             | 0.14 |
| Progression-free survival       |                  |                               |                      | 0.30 |
| Median PFS (months, IQR)        | 10 (4-43)        | 7 (3-27)                      | 12 (7-51)            |      |
| 5-year PFS (% , IQR)            | 33 (20-55)       | 23 (9-60)                     | 41 (23-75)           |      |
| Overall survival,               |                  |                               |                      | 0.90 |
| Median OS (months, IQR)         | 34 (16-61)       | 31 (15-61)                    | 38 (19-60)           |      |
| 5 years of OS (% , IQR)         | 51 (37-71)       | 45 (26-77)                    | 57 (38-85)           |      |
| Cause of Mortality, n (%), n=21 |                  | n=12                          | n=9                  | 0.12 |
| Progression                     | 16 (76.2)        | 11 (91.7)                     | 5 (55.6)             |      |
| Toxicity                        | 4 (19.0)         | 1 (8.3)                       | 3 (33.3)             |      |
| Other                           | 1 (4.8)          | 0                             | 1 (11.1)             |      |

Abbreviations: gDLI= g-csf primed DLI, DLI= Donor Lymphocyte Infusion, GvHD= graft versus host disease, IQR= interquartile range, OS= overall survival, PFS= progression-free survival
